# Supplementary material for: Dissecting the predictive value of MAPK/AKT/estrogen-receptor phosphorylation axis in primary breast cancer to treatment response for tamoxifen over exemestane: a Translational Report of the Intergroup Exemestane Study (IES)—PathIES
Source: Springer Nature journal article supplement (doi:10.1007/s10549-018-05110-x), 2019-01-24
Supplement: MOESM1 [file 16417948]

## Breast Cancer Research and Treatment

### Dissecting the predictive value of MAPK/AKT/Estrogen Receptor phosphorylation axis in primary breast cancer to treatment response for tamoxifen over exemestane: a Translational Report of The Intergroup Exemestane Study (IES) – PathIES

Zsolt Szigyarto<sup>1\*</sup>, Koen D. Flach<sup>2\*</sup>, Mark Opdam<sup>3</sup>, Carlo Palmieri<sup>4,5,6</sup>, Sabine C. Linn<sup>3,7,8</sup>, Jelle Wesseling<sup>3,9</sup>, Simak Ali<sup>6</sup>, Judith M Bliss<sup>1</sup>, Maggie Chon U Cheang<sup>1</sup>, Wilbert Zwart<sup>2</sup>, R. Charles Coombes<sup>6\*</sup>

<sup>1</sup>Clinical Trials and Statistics Unit (ICR-CTSU), Division of Clinical Studies, The Institute of Cancer Research, London, SM2 5NG, UK

<sup>2</sup>Division of Oncogenomics, OncoCode Institute, the Netherlands Cancer Institute, 1066CX Amsterdam, the Netherlands

<sup>3</sup>Division of Molecular Pathology, the Netherlands Cancer Institute, Plesmanlaan 121, 1066CX Amsterdam, the Netherlands

<sup>4</sup>Department of Molecular and Clinical Cancer Medicine, University of Liverpool, Liverpool, L69 3BX, UK

<sup>5</sup>Academic Department of Medical Oncology, Clatterbridge Cancer Centre NHS Foundation Trust, Wirral, CH63 4JY, UK

<sup>6</sup>Department of Surgery and Cancer, Imperial College London, London, W12 0NN, UK

<sup>7</sup>Department of Medical Oncology, the Netherlands Cancer Institute, Plesmanlaan 121, 1066CX Amsterdam, the Netherlands

<sup>8</sup>Department of Pathology, University Medical Center Utrecht, Utrecht, Netherlands

<sup>9</sup>Department of Pathology, the Netherlands Cancer Institute, Plesmanlaan 121, 1066CX Amsterdam, the Netherlands

\*these authors contributed equally to this work

**Authors' email addresses:** Zsolt Szigyarto: Zsolt.Szigyarto@icr.ac.uk; Koen D. Flach: k.flach@nki.nl; Mark Opdam: m.opdam@nki.nl; Carlo Palmieri: C.Palmieri@liverpool.ac.uk; Sabine Linn: s.linn@nki.nl; Jelle Wesseling: j.wesseling@nki.nl; Simak Ali: simak.ali@imperial.ac.uk; Judith M Bliss: Judith.Bliss@icr.ac.uk; Maggie Chon U Cheang: Maggie.Cheang@icr.ac.uk; Wilbert Zwart: w.zwart@nki.nl; R. Charles Coombes: c.coombes@imperial.ac.uk

**\*To whom correspondence should be addressed:** Professor Raoul Charles Coombes, Department of Cancer and Surgery, Faculty of Medicine, Imperial College London, Du Cane Road, London W12 0NN, UK, (+44) 0207 594 2135 c.coombes@imperial.ac.uk

## Online Resource methods section

### Immunohistochemistry staining

TMAAs were stained for pT308AKT, pT202/T204MAPK, pS167ER $\alpha$ , pS118ER $\alpha$  and hematoxylin-eosin (HE) with the ULTRA BenchMark IHC/ISH Staining Module based at the Netherlands Cancer Institute Core Facility Molecular Pathology and Biobanking (Online Resource 2,3). Staining for pS473AKT was performed manually. Additionally, 23 whole tumour section slides were stained, with the exception of the pS118ER $\alpha$  staining for which 118 slides were used. The intensity (0 to 4) and percentage of staining-positive invasive tumour cells (0-100%) were scored by two independent observers. For each staining one TMA was used to calculate the inter-observer variability by using the weighted Cohen's kappa coefficient. When several slides were available for a given tumour, the highest score was used. The scores and/or the intensity of staining were provided for pT308AKT, pS473AKT, pT202/T204MAPK, pS167ER $\alpha$  and pS118ER $\alpha$  markers. There was no external reference cohort with defined thresholds for the phospho-markers investigated, therefore, data driven cut-offs were chosen at the beginning of the analyses to establish well-balanced subcategories: the pT202/T204MAPK, pS167ER $\alpha$  and pS118ER $\alpha$  scores were dichotomised as 0% versus  $\geq 10\%$ , 0% versus  $\geq 10\%$  and 0 - 40% versus  $\geq 50\%$ , respectively. Due to the small number of cases with pT308AKT and pS473AKT of medium and strong intensity, these markers were classified no intensity versus any intensity (weak/medium/strong). In addition, the phospho-markers were combined to assess activation of the pathways. Therefore, pS118ER $\alpha$  and pS167ER $\alpha$  H-scores were also calculated using the percentage and the intensity values from the IHC staining. Both phospho-markers were then dichotomised over their median (median H-score of pS118ER $\alpha$ : 100; median of pS167ER $\alpha$ : 50), giving subgroups characterised with their low and high expressions. The groups of low and high expression of pS118ER $\alpha$  and pS167ER $\alpha$  were combined with the low and high expression of pT202/T204MAPK as well as pAKT as follows: pT202/T204MAPK / pS118ER $\alpha$ , pT308AKT / pS167ER $\alpha$  and pT473AKT / pS167ER $\alpha$  with low/low, low/high, high/low and high/high expressions.

**Online Resource 1** Schematic showing the functional domains and activation sites of ER $\alpha$ . ER $\alpha$  is activated through phosphorylation at serine residues 118 and 167 by MAPK and AKT

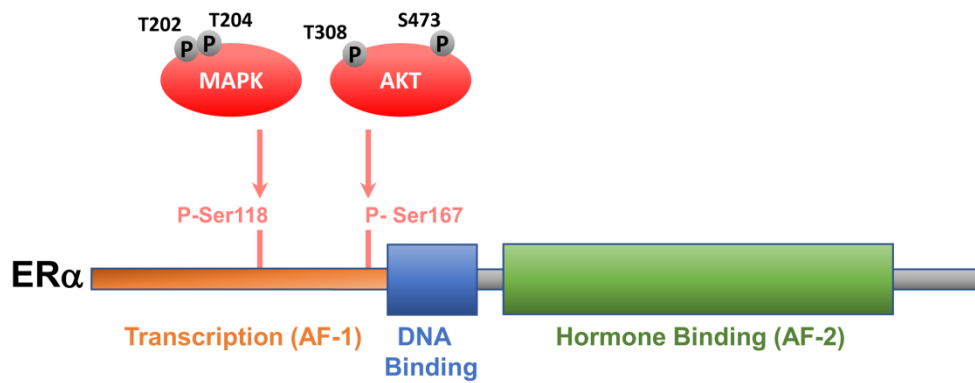

**Online Resource 2** Antibodies used for immunostaining. Source and dilutions of antibodies applied for phospho-markers' staining

| <b>Staining</b>  | <b>Antibody</b>      | <b>Dilution</b> |
|------------------|----------------------|-----------------|
| pT308AKT         | Cell signaling #2965 | 1:50            |
| pS473AKT         | Cell signaling #4060 | 1:50            |
| pT202/T204MAPK   | Cell signaling #4370 | 1:400           |
| pS167ER $\alpha$ | Cell signaling #5587 | 1:50            |
| pS118ER $\alpha$ | Cell signaling #2511 | 1:1200          |

**Online Resource 3** Immunostaining specifications. Antigen retrieval and antibody incubation time for each phospho-marker

| <b>Staining</b>  | <b>Antigen retrieval incubation</b> | <b>Used buffer</b> | <b>Antibody incubation</b> |
|------------------|-------------------------------------|--------------------|----------------------------|
| pT308AKT         | 36 min                              | CC1 <sup>a</sup>   | 1 hour                     |
| pS473AKT         | 15 min                              | Citrate            | 16 hours                   |
| pT202/T204MAPK   | 64 min                              | CC2 <sup>b</sup>   | 1 hour                     |
| pS167ER $\alpha$ | 44 min                              | CC2                | 1 hour                     |
| pS118ER $\alpha$ | 92 min                              | CC1                | 0.5 hour                   |

<sup>a</sup>CC1 (Ultra Cell Conditioning 1, Ventana, #950-224). <sup>b</sup>CC2 (Ultra Cell Conditioning 2, Ventana, #950-223)

**Online Resource 4** PathIES participants with biomarker data. Comparison of patient's characteristics with and without any biomarker data (N=1036 versus 3688)

|                              | Participants with any BM <sup>a</sup> scores |      | Participants without any BM scores |      | $\chi^2$ test P-value |
|------------------------------|----------------------------------------------|------|------------------------------------|------|-----------------------|
|                              | Total N = 1036                               |      | Total N = 3688                     |      |                       |
|                              | N                                            | %    | N                                  | %    |                       |
| Treatment                    |                                              |      |                                    |      | 0.20                  |
| Exemestane                   | 534                                          | 51.5 | 1818                               | 49.3 |                       |
| Tamoxifen                    | 502                                          | 48.5 | 1870                               | 50.7 |                       |
| Age (years)                  |                                              |      |                                    |      | 0.20                  |
| <60                          | 347                                          | 33.5 | 1176                               | 31.9 |                       |
| 60-69                        | 452                                          | 43.6 | 1569                               | 42.5 |                       |
| 70+                          | 237                                          | 22.9 | 943                                | 25.6 |                       |
| Grade (G)                    |                                              |      |                                    |      | 0.60                  |
| G1                           | 186                                          | 18.0 | 603                                | 16.4 |                       |
| G2                           | 453                                          | 43.7 | 1534                               | 41.6 |                       |
| G3/Undifferentiated          | 199                                          | 19.2 | 724                                | 19.6 |                       |
| Not assessable               | 10                                           | 1.0  | 93                                 | 2.5  |                       |
| Unknown                      | 188                                          | 18.1 | 734                                | 19.9 |                       |
| Nodes (N)                    |                                              |      |                                    |      | <0.001                |
| N-                           | 447                                          | 43.1 | 2000                               | 54.2 |                       |
| 1-3N+                        | 371                                          | 35.8 | 1060                               | 28.7 |                       |
| >3N+                         | 159                                          | 15.3 | 499                                | 13.5 |                       |
| Unavailable                  | 59                                           | 5.7  | 129                                | 3.5  |                       |
| Tumour size (cm)             |                                              |      |                                    |      | 0.33                  |
| ≤2                           | 596                                          | 57.5 | 60.8                               | 59.3 |                       |
| >2 & ≤5                      | 393                                          | 37.9 | 36.7                               | 35.9 |                       |
| >5                           | 31                                           | 3.0  | 2.5                                | 2.5  |                       |
| Unavailable                  | 16                                           | 1.6  | 85                                 | 2.3  |                       |
| Histology type               |                                              |      |                                    |      | 0.13                  |
| Infiltrating ductal          | 768                                          | 74.1 | 2839                               | 77.0 |                       |
| Infiltrating lobular         | 160                                          | 15.5 | 502                                | 13.6 |                       |
| Other                        | 108                                          | 10.4 | 338                                | 9.2  |                       |
| Unavailable                  | 0                                            | 0    | 9                                  | 0.2  |                       |
| Previous CT <sup>b</sup> use |                                              |      |                                    |      | <0.001                |
| No                           | 839                                          | 81.0 | 2343                               | 63.5 |                       |
| Yes                          | 197                                          | 19.0 | 1345                               | 36.5 |                       |
| HRT <sup>c</sup> use         |                                              |      |                                    |      | <0.001                |
| No                           | 677                                          | 65.3 | 2810                               | 76.2 |                       |
| Yes                          | 323                                          | 31.2 | 801                                | 21.7 |                       |
| Unknown                      | 36                                           | 3.5  | 77                                 | 2.1  |                       |

<sup>a</sup>BM – biomarker; <sup>b</sup>CT – chemotherapy; <sup>c</sup>HRT – hormone replacement therapy

**Online Resource 5** Scoring of the phospho-markers by independent observers. Weighted Cohen's kappa coefficient for assessing inter-observer variability

| <b>Staining</b>  | <b>Cut-off</b>              | <b>Kappa</b> |
|------------------|-----------------------------|--------------|
| pT308AKT         | Intensity 0 vs 1+2+3        | 0.675        |
| pS473AKT         | Intensity 0 vs 1+2+3        | 0.685        |
| pT202/T204MAPK   | Percentage 0% vs 10-100%    | 0.916        |
| pS167ER $\alpha$ | Percentage 0% vs 10-100%    | 0.783        |
| pS118ER $\alpha$ | Percentage 0-40% vs 50-100% | 0.823        |

**Additional file 6** Staining scores of pT202/T204MAPK, pS118ER $\alpha$  and pS167ER $\alpha$ . Distribution of pT202/T204MAPK, pS118ER $\alpha$  pS167ER $\alpha$  by treatment strategies

| Scores (%)   | pT202/T204MAPK   |                  | pS118ER $\alpha$ |                  | pS167ER $\alpha$ |                  |
|--------------|------------------|------------------|------------------|------------------|------------------|------------------|
|              | Tamoxifen N (%)  | Exemestane N (%) | Tamoxifen N (%)  | Exemestane N (%) | Tamoxifen N (%)  | Exemestane N (%) |
| 0            | 160 (49.8)       | 199 (56.5)       | 41 (10.9)        | 57 (14.1)        | 133 (44.6)       | 162 (49.7)       |
| 10           | 52 (16.2)        | 46 (13.0)        | 34 (9.0)         | 49 (12.1)        | 48 (16.1)        | 49 (15.0)        |
| 20           | 13 (4.0)         | 15 (4.3)         | 57 (15.2)        | 51 (12.6)        | 17 (5.7)         | 21 (6.4)         |
| 30           | 20 (6.2)         | 12 (3.4)         | 36 (9.6)         | 29 (7.2)         | 17 (5.7)         | 14 (4.3)         |
| 40           | 14 (4.4)         | 15 (4.3)         | 17 (4.5)         | 29 (7.2)         | 13 (4.4)         | 13 (4.0)         |
| 50           | 17 (5.3)         | 15 (4.3)         | 18 (4.8)         | 25 (6.2)         | 12 (4.0)         | 14 (4.3)         |
| 60           | 5 (1.6)          | 8 (2.3)          | 26 (6.9)         | 29 (7.2)         | 6 (2.0)          | 5 (1.5)          |
| 70           | 8 (2.5)          | 11 (3.1)         | 33 (8.8)         | 28 (6.9)         | 15 (5.0)         | 10 (3.1)         |
| 80           | 8 (2.5)          | 9 (2.6)          | 27 (7.2)         | 33 (8.2)         | 7 (2.4)          | 10 (3.1)         |
| 90           | 9 (2.8)          | 10 (2.8)         | 56 (14.9)        | 40 (9.9)         | 15 (5.0)         | 14 (4.3)         |
| 100          | 15 (4.7)         | 12 (3.4)         | 31 (8.2)         | 34 (8.4)         | 15 (5.0)         | 14 (4.3)         |
| <b>Total</b> | <b>321 (100)</b> | <b>352 (100)</b> | <b>376 (100)</b> | <b>404 (100)</b> | <b>298 (100)</b> | <b>326 (100)</b> |



**Online Resource 7** Histograms of staining scores (%) by treatments. **a** Scores of pT202/T204MAPK by treatments. **b** Scores of pS167ER $\alpha$  by treatments. **c** Scores of pS118ER $\alpha$  by treatments

**a**

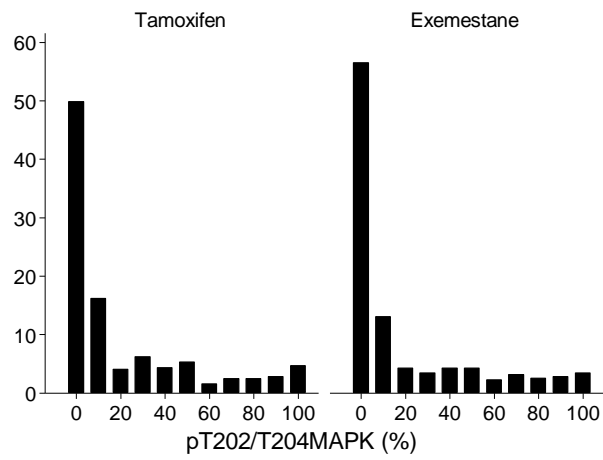

**b**

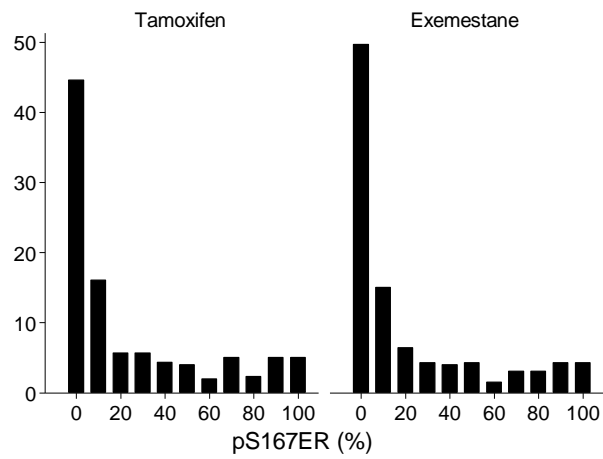

**c**

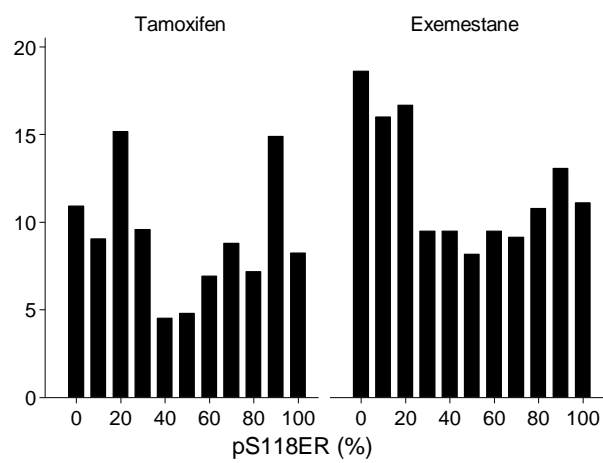

**Online Resource 8** Association of the dichotomised phospho-markers with the clinical and pathological characteristics. Distribution of phospho-markers among the clinicopathological characteristics and the associated trend tests

|                               | pT308AKT                            |                               |               | pS473AKT               |                  |               | pT202/T204MAPK         |             |               | pS118ERα               |                   |               | pS167ERα               |             |               |
|-------------------------------|-------------------------------------|-------------------------------|---------------|------------------------|------------------|---------------|------------------------|-------------|---------------|------------------------|-------------------|---------------|------------------------|-------------|---------------|
|                               | Total<br>N                          | no int. <sup>a</sup><br>N (%) | int.<br>N (%) | Total<br>N             | no int.<br>N (%) | int.<br>N (%) | Total<br>N             | 0%<br>N (%) | ≥10%<br>N (%) | Total<br>N             | 0 - 40 %<br>N (%) | ≥50%<br>N (%) | Total<br>N             | 0%<br>N (%) | ≥10%<br>N (%) |
| <b>Age (years)</b>            |                                     |                               |               |                        |                  |               |                        |             |               |                        |                   |               |                        |             |               |
| <60                           | 219                                 | 108 (32.7)                    | 111 (37.4)    | 234                    | 111 (33.3)       | 123 (53.3)    | 227                    | 107 (29.8)  | 120 (38.2)    | 270                    | 123 (30.8)        | 147 (38.7)    | 206                    | 88 (29.8)   | 118 (35.9)    |
| 60-69                         | 268                                 | 150 (45.5)                    | 118 (39.7)    | 297                    | 151 (45.3)       | 146 (42.0)    | 292                    | 162 (45.1)  | 130 (41.4)    | 330                    | 176 (44.0)        | 154 (40.5)    | 274                    | 134 (45.4)  | 140 (42.6)    |
| 70+                           | 140                                 | 72 (21.8)                     | 68 (22.9)     | 150                    | 71 (21.3)        | 79 (22.7)     | 154                    | 90 (25.1)   | 64 (20.4)     | 180                    | 101 (25.3)        | 79 (20.8)     | 144                    | 73 (24.7)   | 71 (21.6)     |
| Trend test                    | p <sub>BH</sub> <sup>b</sup> = 0.69 |                               |               | p <sub>BH</sub> = 0.94 |                  |               | p <sub>BH</sub> = 0.07 |             |               | p <sub>BH</sub> = 0.07 |                   |               | p <sub>BH</sub> = 0.29 |             |               |
| <b>Hist. grade</b>            |                                     |                               |               |                        |                  |               |                        |             |               |                        |                   |               |                        |             |               |
| G1                            | 98                                  | 51 (18.0)                     | 47 (18.7)     | 117                    | 56 (20.4)        | 61 (20.6)     | 115                    | 43 (14.7)   | 72 (27.1)     | 145                    | 64 (19.3)         | 81 (24.8)     | 109                    | 44 (17.6)   | 65 (23.6)     |
| G2                            | 305                                 | 171 (60.4)                    | 134 (53.4)    | 302                    | 148 (53.8)       | 154 (52.0)    | 300                    | 163 (55.8)  | 137 (51.5)    | 353                    | 173 (52.3)        | 180 (55.0)    | 287                    | 141 (56.4)  | 146 (53.1)    |
| G3                            | 131                                 | 61 (21.6)                     | 70 (27.9)     | 162                    | 78 (25.8)        | 84 (27.4)     | 151                    | 93 (29.5)   | 58 (21.4)     | 169                    | 103 (28.4)        | 66 (20.2)     | 135                    | 69 (26.0)   | 66 (23.3)     |
| Trend test                    | p <sub>BH</sub> = 0.42              |                               |               | p <sub>BH</sub> = 0.94 |                  |               | p <sub>BH</sub> = 0.01 |             |               | p <sub>BH</sub> = 0.05 |                   |               | p <sub>BH</sub> = 0.65 |             |               |
| <b>Tumour size (cm)</b>       |                                     |                               |               |                        |                  |               |                        |             |               |                        |                   |               |                        |             |               |
| ≤2                            | 370                                 | 182 (55.7)                    | 188 (64.0)    | 388                    | 183 (55.8)       | 205 (59.4)    | 381                    | 161 (45.5)  | 220 (70.5)    | 437                    | 193 (49.0)        | 244 (65.2)    | 368                    | 158 (51.4)  | 210 (64.8)    |
| >2 & ≤5                       | 229                                 | 129 (39.4)                    | 100 (34.0)    | 262                    | 133 (40.5)       | 129 (37.4)    | 262                    | 178 (50.3)  | 84 (26.9)     | 306                    | 185 (47.0)        | 121 (32.4)    | 227                    | 121 (41.4)  | 106 (32.7)    |
| >5                            | 22                                  | 16 (4.9)                      | 6 (2.0)       | 23                     | 12 (3.7)         | 11 (3.2)      | 23                     | 15 (4.2)    | 8 (2.6)       | 25                     | 16 (4.0)          | 9 (2.4)       | 21                     | 13 (4.5)    | 8 (2.5)       |
| Trend test                    | p <sub>BH</sub> = 0.07              |                               |               | p <sub>BH</sub> = 0.53 |                  |               | p <sub>BH</sub> = 0.01 |             |               | p <sub>BH</sub> = 0.01 |                   |               | p <sub>BH</sub> = 0.03 |             |               |
| <b>Nodal status</b>           |                                     |                               |               |                        |                  |               |                        |             |               |                        |                   |               |                        |             |               |
| negative                      | 292                                 | 156 (50.0)                    | 136 (48.9)    | 304                    | 149 (47.0)       | 155 (47.7)    | 306                    | 162 (47.0)  | 144 (49.7)    | 347                    | 179 (47.6)        | 168 (46.4)    | 291                    | 146 (52.3)  | 145 (47.2)    |
| 1-3 N+                        | 204                                 | 105 (33.7)                    | 99 (35.6)     | 234                    | 115 (36.3)       | 119 (36.6)    | 226                    | 127 (36.8)  | 99 (34.1)     | 277                    | 137 (36.4)        | 140 (38.7)    | 200                    | 88 (31.5)   | 112 (36.5)    |
| 4-9 N+                        | 67                                  | 38 (12.2)                     | 29 (10.4)     | 76                     | 41 (12.9)        | 35 (10.8)     | 74                     | 42 (12.2)   | 32 (11.0)     | 85                     | 45 (12.0)         | 40 (11.0)     | 66                     | 31 (11.1)   | 35 (11.4)     |
| ≥10 N+                        | 27                                  | 13 (4.2)                      | 14 (5.0)      | 28                     | 12 (3.8)         | 16 (4.9)      | 29                     | 14 (4.1)    | 15 (5.2)      | 29                     | 15 (4.0)          | 14 (3.9)      | 29                     | 14 (5.0)    | 15 (4.9)      |
| Trend test                    | p <sub>BH</sub> = 0.94              |                               |               | p <sub>BH</sub> = 0.94 |                  |               | p <sub>BH</sub> = 0.82 |             |               | p <sub>BH</sub> = 0.94 |                   |               | p <sub>BH</sub> = 0.53 |             |               |
| <b>Hist.<sup>c</sup> type</b> |                                     |                               |               |                        |                  |               |                        |             |               |                        |                   |               |                        |             |               |
| ductal                        | 493                                 | 251 (76.1)                    | 242 (81.5)    | 534                    | 250 (75.1)       | 284 (81.6)    | 517                    | 281 (78.3)  | 236 (75.2)    | 610                    | 322 (80.5)        | 288 (75.8)    | 485                    | 230 (78.0)  | 255 (77.5)    |
| lobular                       | 76                                  | 48 (14.5)                     | 28 (9.4)      | 71                     | 37 (11.1)        | 34 (9.8)      | 86                     | 42 (11.7)   | 44 (14.0)     | 91                     | 37 (9.3)          | 54 (14.2)     | 72                     | 31 (10.5)   | 41 (12.5)     |
| other                         | 58                                  | 31 (9.4)                      | 27 (9.1)      | 76                     | 46 (13.8)        | 30 (8.6)      | 70                     | 36 (10.0)   | 34 (10.8)     | 79                     | 41 (10.3)         | 38 (10.0)     | 67                     | 34 (11.5)   | 33 (10.0)     |
| Trend test                    | p <sub>BH</sub> = 0.30              |                               |               | p <sub>BH</sub> = 0.08 |                  |               | p <sub>BH</sub> = 0.53 |             |               | p <sub>BH</sub> = 0.34 |                   |               | p <sub>BH</sub> = 0.98 |             |               |

<sup>a</sup>int. - intensity; <sup>b</sup>p<sub>BH</sub> - Benjamini-Hochberg adjusted p value, <sup>c</sup>Hist. - Histology

**Online Resource 9** Kaplan-Meier DFS and OS estimates for pS118ER $\alpha$ . **a** DFS and **d** OS estimates by pS118ER $\alpha$  groups regardless treatments received. **b** DFS and **e** OS estimates by treatments for patients with pS118ER $\alpha$  intensity of 0 - 40%. **c** DFS and **f** OS estimates by treatments for patients with pS118ER $\alpha$  intensity of  $\geq 50\%$ . (Abbreviations: p – unadjusted, p<sub>BH</sub> – Benjamini-Hochberg adjusted, Tam – tamoxifen, Exem – exemestane)

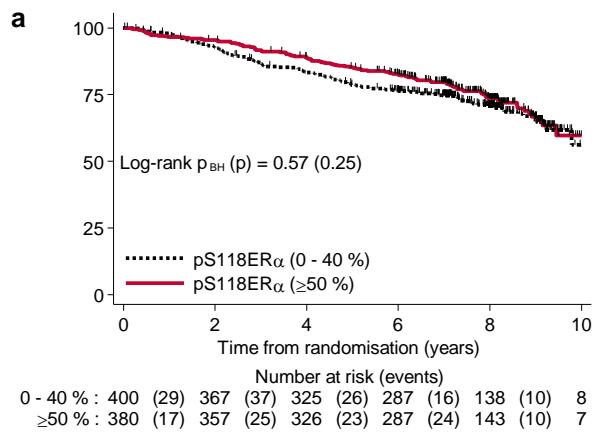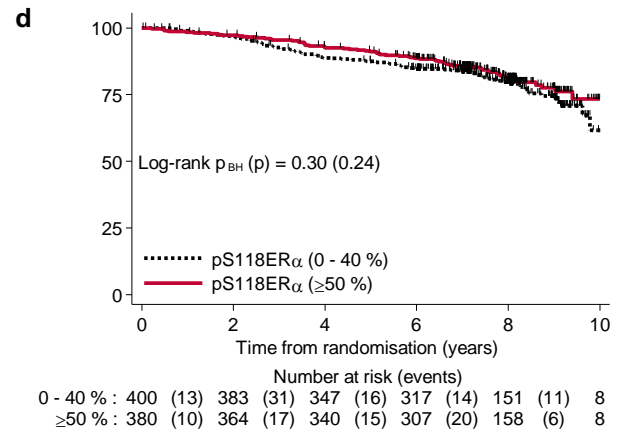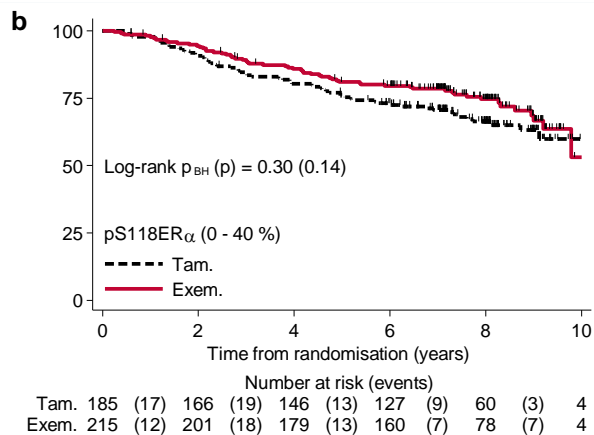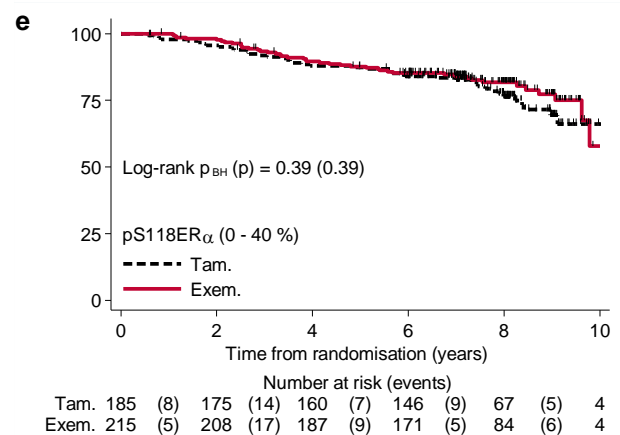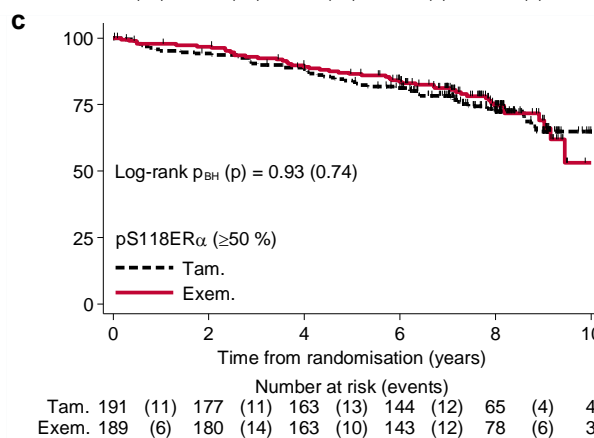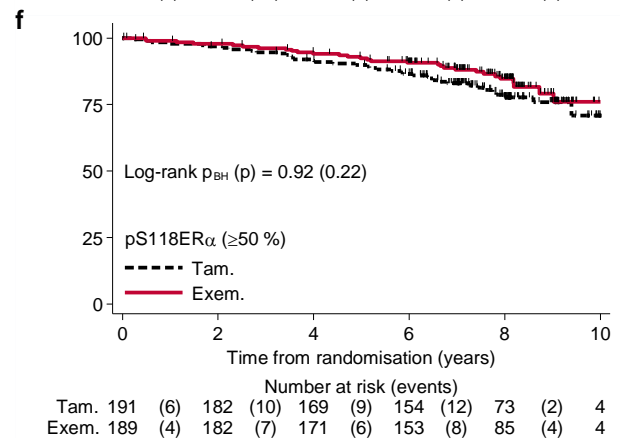

**Online Resource 10** Kaplan-Meier DFS and OS estimates for pT308AKT **a** DFS and **d** OS estimates by pT308AKT groups regardless treatments received. **b** DFS and **e** OS estimates by treatments for patients without pT308AKT intensity. **c** DFS and **f** OS estimates by treatments for patients with pT308AKT intensity. (Abbreviations: p – unadjusted,  $p_{BH}$  – Benjamini-Hochberg adjusted, Tam – tamoxifen, Exem – exemestane)

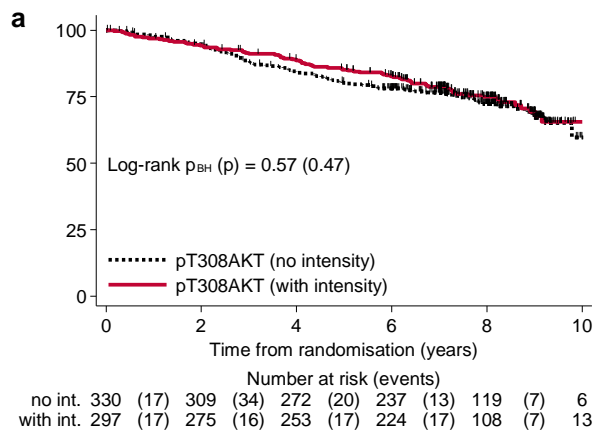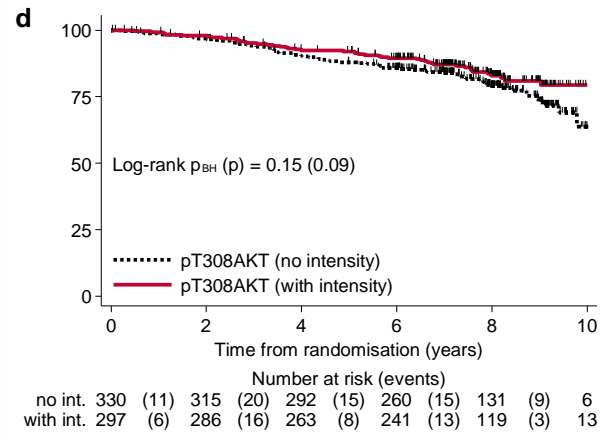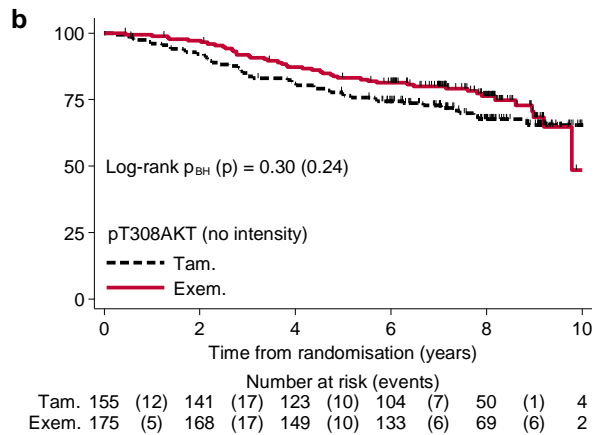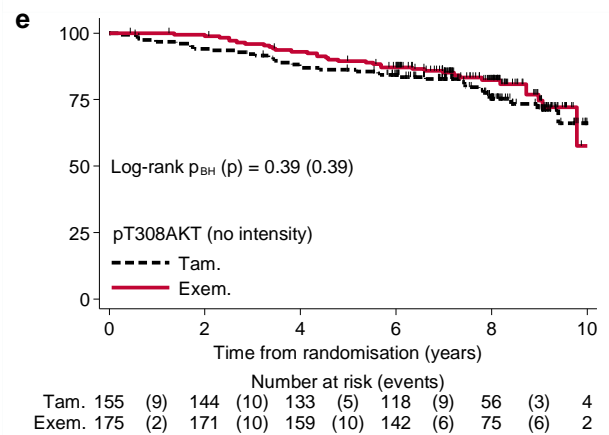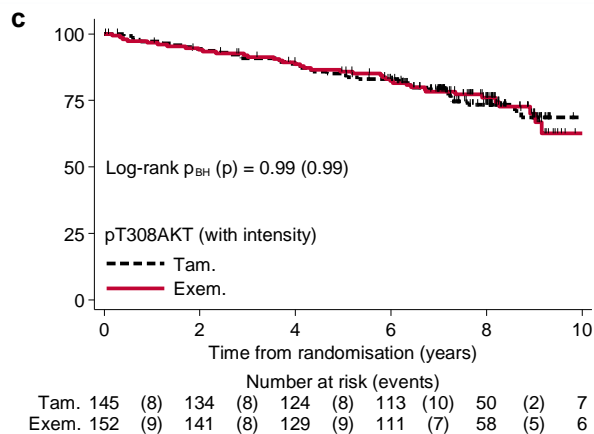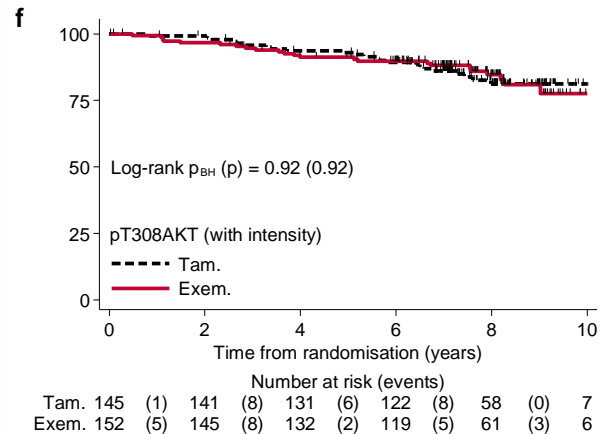

**Online Resource 11** Kaplan-Meier DFS and OS estimates for pS473AKT. **a** DFS and **d** OS estimates by groups of pS473AKT regardless treatments received. **b** DFS and **e** OS estimates by treatments for patients without pS473AKT intensity. **c** DFS and **f** OS estimates by treatments for patients with pS473AKT intensity. (Abbreviations: p – unadjusted,  $p_{BH}$  – Benjamini-Hochberg adjusted, Tam – tamoxifen, Exem – exemestane)

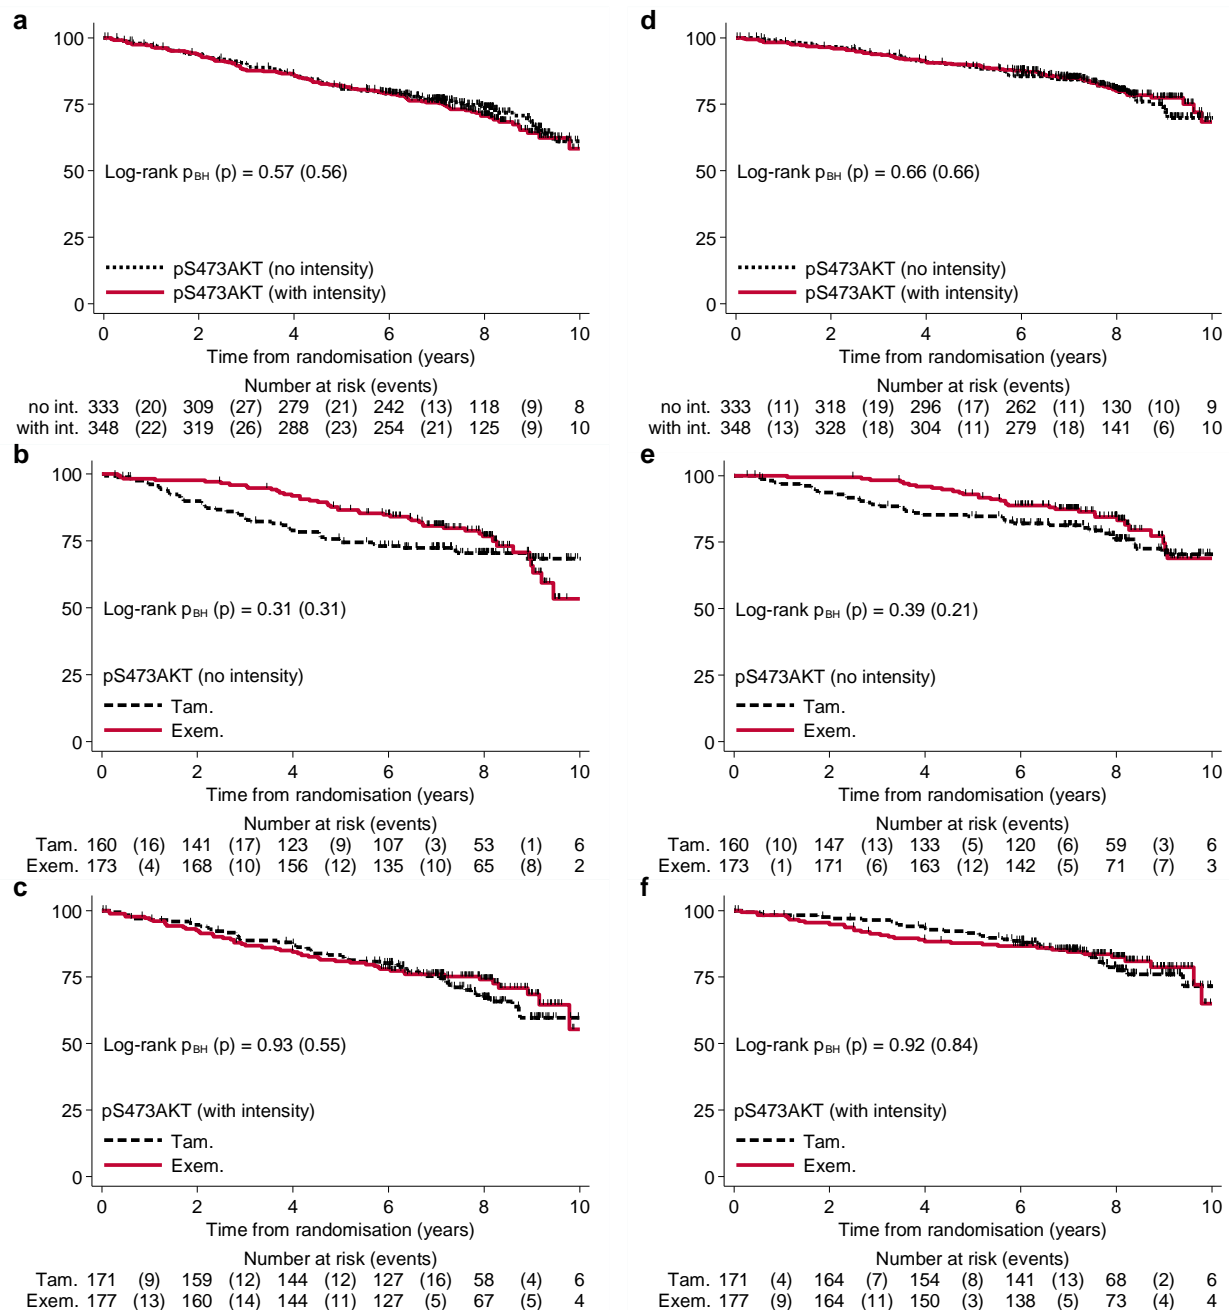

**Online Resource 12** Kaplan-Meier estimates for DFS and OS by biological pathways regardless treatment received. **a** DFS and **d** OS estimates by pT202/T204MAPK / pS118ER $\alpha$  groups. **b** DFS and **e** OS estimates by pT308AKT / pS167ER $\alpha$  groups. **c** DFS and **f** OS estimates by pS473AKT / pS167ER $\alpha$  groups. (Abbreviations: p – unadjusted, p<sub>BH</sub> – Benjamini-Hochberg adjusted)

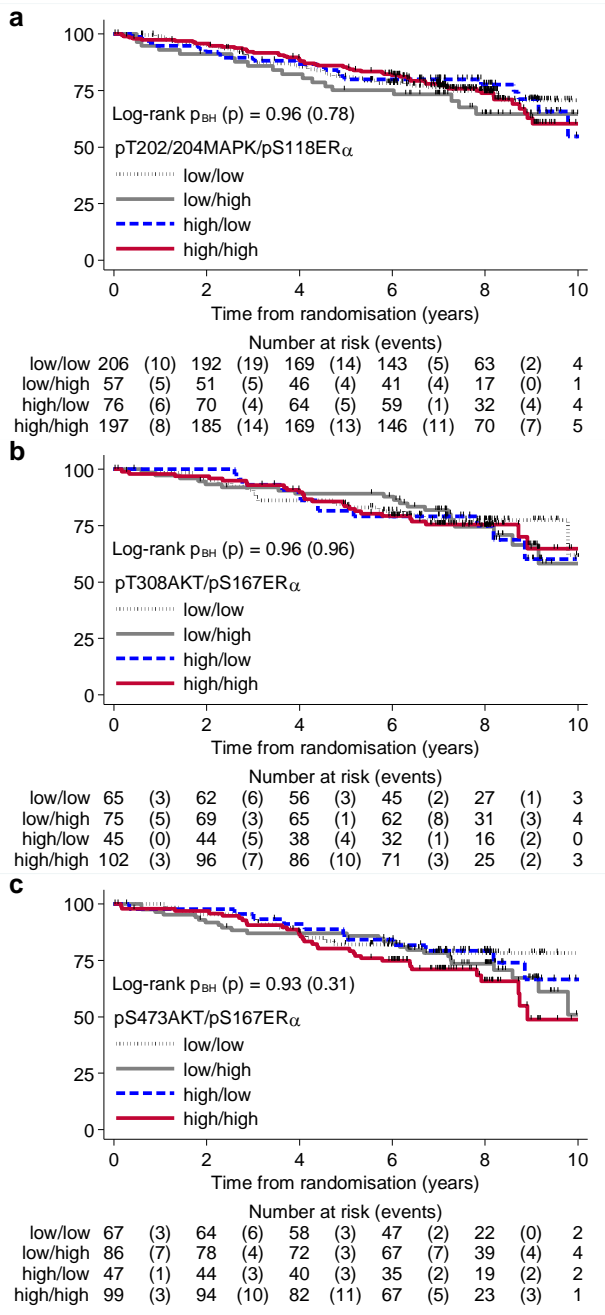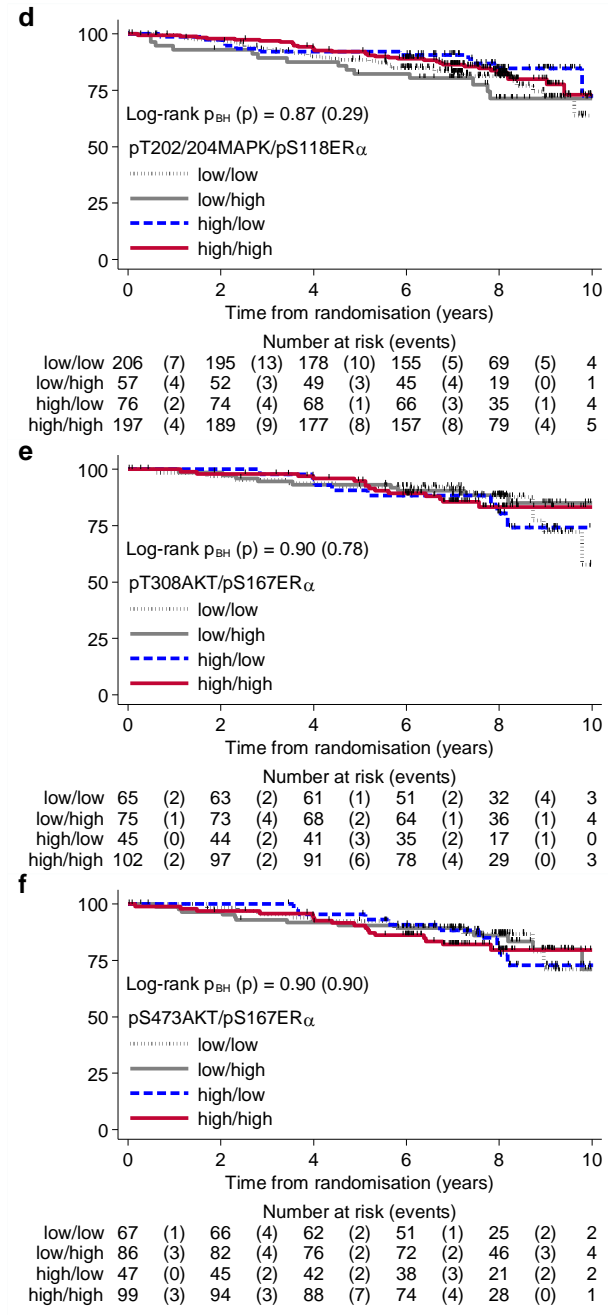

**Online Resource 13** Association of biological pathways with disease-free survival (DFS). Univariate Cox PH models for DFS by signalling pathways

| <b>Biological pathways</b>                       | <b>Univariate CoxPH for DFS</b> |                                   |
|--------------------------------------------------|---------------------------------|-----------------------------------|
|                                                  | <b>HR (95 % CI)<sup>a</sup></b> | <b>p<sub>BH</sub><sup>b</sup></b> |
| <b>pT202/T204MAPK/pS118ER<math>\alpha</math></b> |                                 |                                   |
| Low/low                                          | 1.00                            |                                   |
| Low/high                                         | 1.30 (0.76 to 2.23)             | 0.91                              |
| High/low                                         | 0.97 (0.57 to 1.63)             | 0.91                              |
| High/high                                        | 1.05 (0.71 to 1.55)             | 0.91                              |
| <b>pT308AKT/pS167ER<math>\alpha</math></b>       |                                 |                                   |
| Low/low                                          | 1.00                            |                                   |
| Low/high                                         | 1.13 (0.58 to 2.21)             | 0.91                              |
| High/low                                         | 1.21 (0.57 to 2.60)             | 0.91                              |
| High/high                                        | 1.17 (0.61 to 2.22)             | 0.91                              |
| <b>pSAKT473/pS167ER<math>\alpha</math></b>       |                                 |                                   |
| Low/low                                          | 1.00                            |                                   |
| Low/high                                         | 1.30 (0.68 to 2.51)             | 0.91                              |
| High/low                                         | 1.98 (0.48 to 2.31)             | 0.91                              |
| High/high                                        | 2.71 (0.90 to 3.16)             | 0.91                              |

<sup>a</sup>CI – confidence interval, <sup>b</sup>p<sub>BH</sub> - Benjamini-Hochberg adjusted p

**Online Resource 14** Association of biological pathways with overall survival (OS). Univariate Cox PH models for OS by signalling pathways

| <b>Biological pathways</b>     | <b>Univariate CoxPH for OS</b>  |                                   |
|--------------------------------|---------------------------------|-----------------------------------|
|                                | <b>HR (95 % CI)<sup>a</sup></b> | <b>p<sub>BH</sub><sup>b</sup></b> |
| <b>pT202/T204MAPK/pS118ERα</b> |                                 |                                   |
| Low/low                        | 1.00                            |                                   |
| Low/high                       | 1.24 (0.68 to 2.29)             | 0.97                              |
| High/low                       | 0.63 (0.32 to 1.23)             | 0.97                              |
| High/high                      | 0.80 (0.50 to 1.27)             | 0.97                              |
| <b>pT308AKT/pS167ERα</b>       |                                 |                                   |
| Low/low                        | 1.00                            |                                   |
| Low/high                       | 0.71 (0.29 to 1.71)             | 0.97                              |
| High/low                       | 1.15 (0.46 to 2.87)             | 0.97                              |
| High/high                      | 0.95 (0.43 to 2.09)             | 0.97                              |
| <b>pSAKT473/pS167ERα</b>       |                                 |                                   |
| Low/low                        | 1.00                            |                                   |
| Low/high                       | 0.99 (0.44 to 2.23)             | 0.97                              |
| High/low                       | 1.19 (0.48 to 2.93)             | 0.97                              |
| High/high                      | 1.25 (0.57 to 2.73)             | 0.97                              |

<sup>a</sup>CI – confidence interval, <sup>b</sup>p<sub>BH</sub> - Benjamini-Hochberg adjusted p
